# Supplementary material for: Simultaneous targeting of mitochondria and monocytes enhances neuroprotection against ischemia–reperfusion injury
Source: PubMed Central journal article supplement (PMC7468234; doi:10.1038/s41598-020-71326-x), 2020-09-02
Supplement: 41598_2020_71326_MOESM1_ESM.pdf [file 41598_2020_71326_MOESM1_ESM.pdf]

# **Simultaneous Targeting of Mitochondria and Monocytes Enhances Neuroprotection against Ischemia-reperfusion Injury**

Arihide Okahara<sup>1</sup>, Jun-ichiro Koga<sup>1,2\*</sup>, Tetsuya Matoba<sup>1</sup>, Masaki Fujiwara<sup>1</sup>,  
Masaki Tokutome<sup>1</sup>, Gentaro Ikeda<sup>1</sup>, Kaku Nakano<sup>2</sup>, Masaki Tachibana<sup>3</sup>, Tetsuro Ago<sup>3</sup>,  
Takanari Kitazono<sup>3</sup>, Hiroyuki Tsutsui<sup>1</sup>, Kensuke Egashira<sup>2,4</sup>

<sup>1</sup>Department of Cardiovascular Medicine, Graduate School of Medical Sciences, Kyushu University, Fukuoka, Japan; <sup>2</sup>Department of Cardiovascular Research, Development, and Translational Medicine, Center for Cardiovascular Disruptive Innovation, Kyushu University, Fukuoka, Japan; <sup>3</sup>Department of Medicine and Clinical Science, Graduate School of Medical Sciences, Kyushu University, Fukuoka, Japan; <sup>4</sup>Department of Translational Medicine, Kyushu University Graduate School of Pharmaceutical Sciences, Fukuoka, Japan.

\* Correspondence author: Jun-ichiro Koga, MD, PhD;

E-mail: [j-koga@cardiol.med.kyushu-u.ac.jp](mailto:j-koga@cardiol.med.kyushu-u.ac.jp)

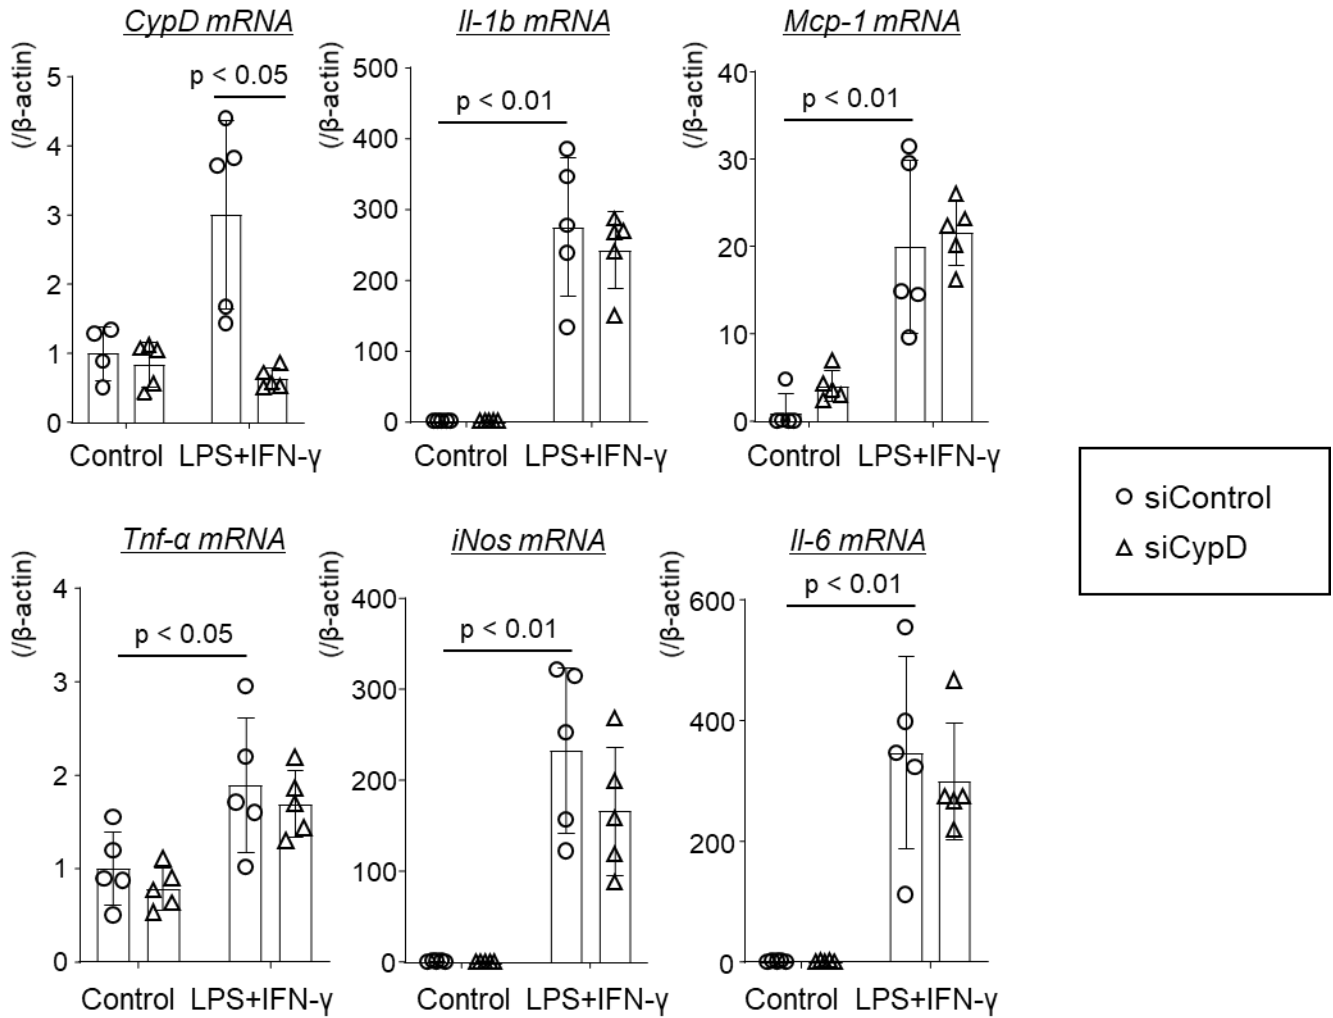

**Supplemental Figure 1. siRNA-mediated knockdown of CypD in RAW264.7 cells.** RAW264.7 cells were treated with 10 ng/mL and 10 ng/mL IFN- $\gamma$  for 24 hours. siControl; control scramble siRNA, siCypD: CypD targeting siRNA. N=5.

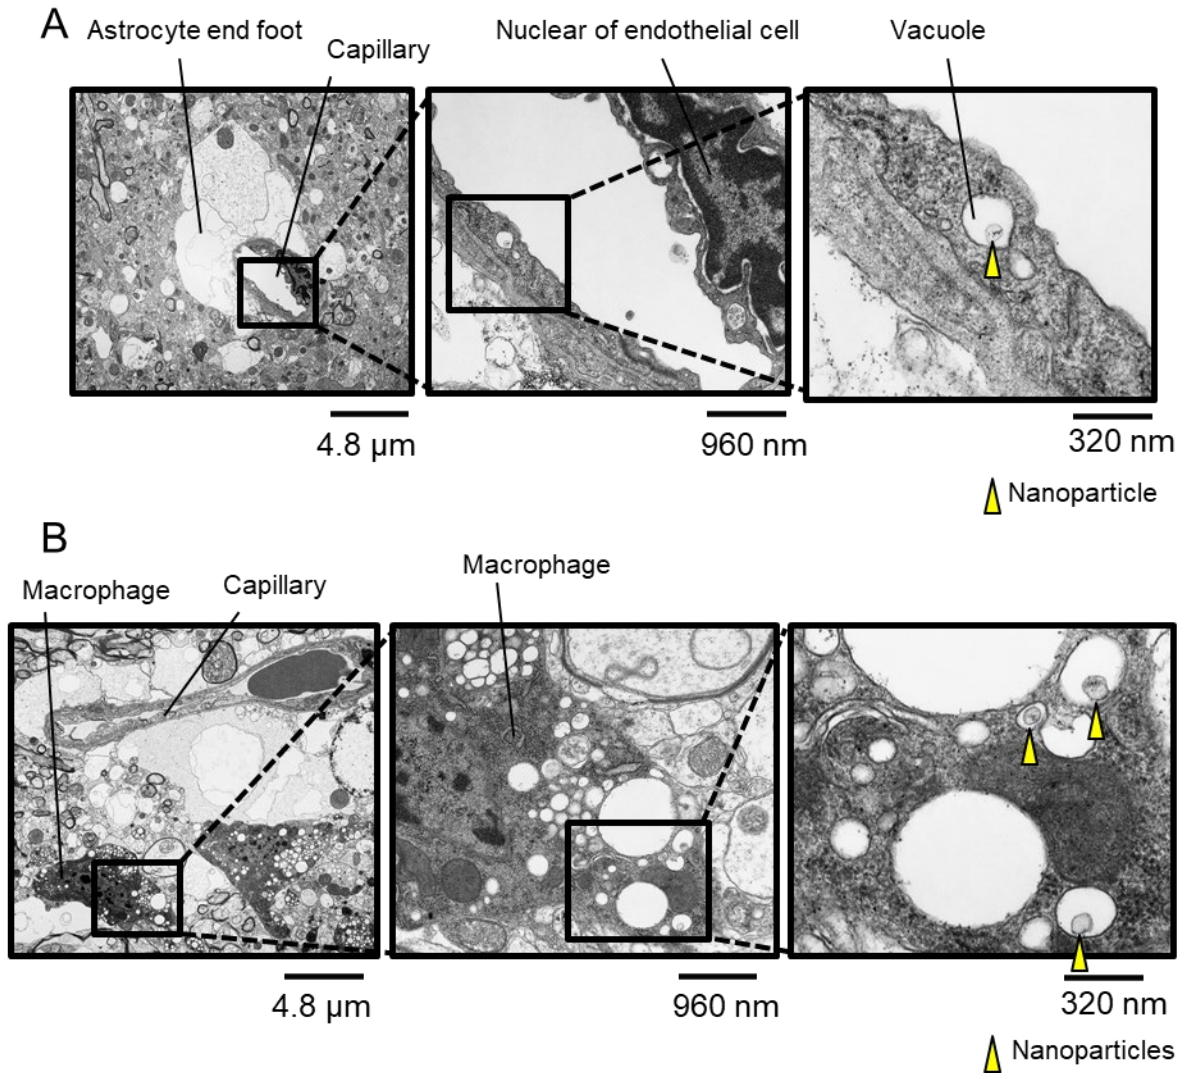

**Supplemental Figure 2. Electron microscopic images of the brain tissue acquired 6 hours after IR injury.** FITC-NPs (containing 4 mg/kg FITC) were intravenously injected at the time of reperfusion. PLGA-NPs were observed in vesicular structures of vascular endothelial cells (A) and macrophages (B). Arrowhead indicates PLGA-NP.

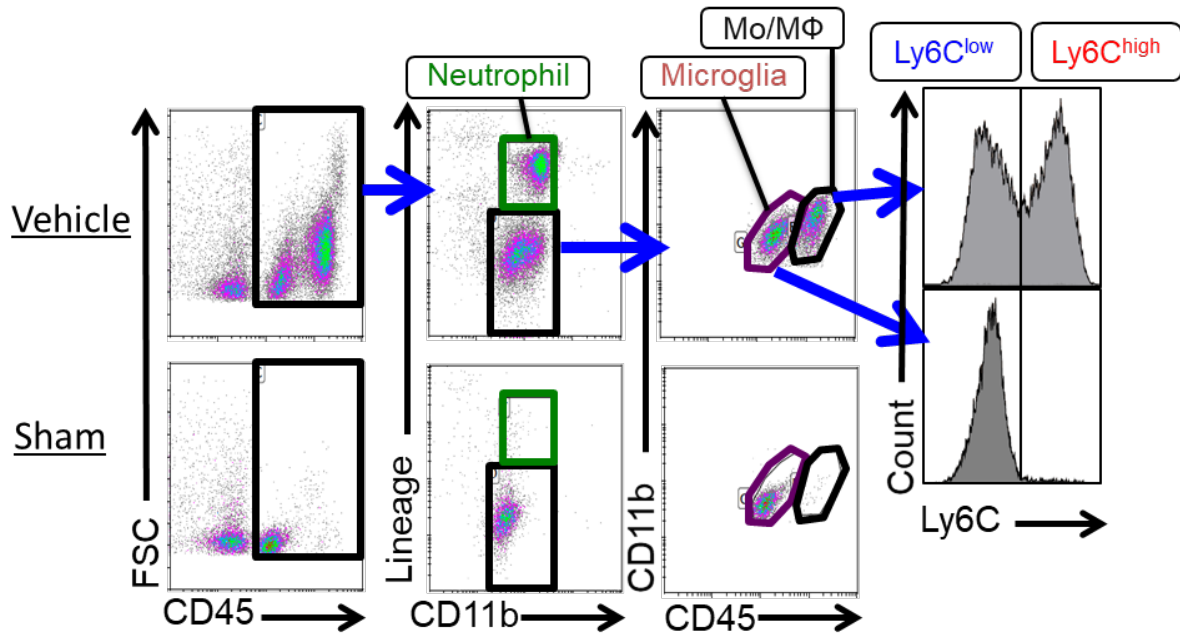

**Supplemental Figure 3. Flow cytometric gating strategy for the neutrophil, microglia and monocyte/macrophage populations.**
